# Supplementary material for: Different transmetallation behaviour of [M(P4HR4)] salts toward rhodium(i) and copper(i) (M = Na, K; R = Ph, Mes; Mes = 2,4,6-Me3C6H2)
Source: Royal Society of Chemistry journal article supplement (doi:10.1039/b718727k), 2008-01-01

## Supporting information.

The supporting information contains:

1. Simulated and experimental  $^{31}\text{P}$  NMR spectrum of  $[\text{Rh}(\text{P}_4\text{HMe}_4)(\text{cod})]$  (**3**)
2. Variable temperature  $^{31}\text{P}\{^1\text{H}\}$  NMR spectra of  $[\text{Rh}_2(\mu\text{-P}_2\text{HMe}_2)(\mu\text{-PHMe})(\text{cod})_2]$  (**4**)

### 1. Simulated (top) and experimental (bottom) $^{31}\text{P}$ NMR spectrum of $[\text{Rh}(\text{P}_4\text{HMe}_4)(\text{cod})]$ (**3**)

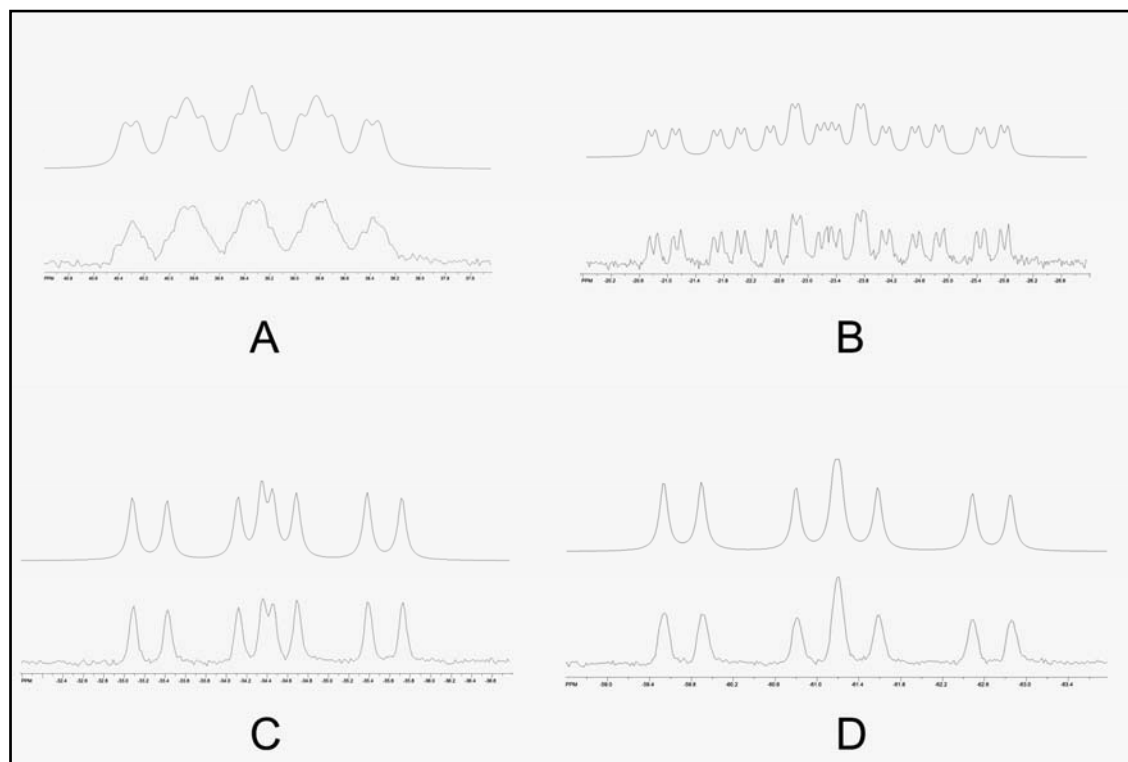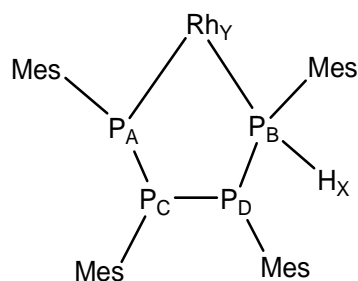

$^{31}\text{P}$  NMR (THF/ $[\text{D}_8]$ , 25 °C, for the predominant isomer): 39.34 (m,  $\text{P}_\text{A}$ ,  $^1J_{\text{AC}} = 167.55$ ,  $^1J_{\text{AY}} = 85.32$ ,  $^2J_{\text{AB}} = 16.54$ ,  $^2J_{\text{AD}} = 57.96$ ,  $^3J_{\text{AX}} = 5.29$  Hz), -23.31 (m,  $\text{P}_\text{B}$ ,  $^1J_{\text{BD}} = 272.71$ ,  $^1J_{\text{BY}} = 160.60$ ,  $^1J_{\text{BX}} = 335.24$ ,  $^2J_{\text{BC}} = 55.29$ ), -34.41 (m,  $\text{P}_\text{C}$ ,  $^1J_{\text{CD}} = 205.56$ ), -61.16 (m,  $\text{P}_\text{D}$ ).

2. Variable temperature  $^{31}\text{P}\{^1\text{H}\}$  NMR spectra of  $[\text{Rh}_2(\mu\text{-P}_2\text{HMes}_2)(\mu\text{-PHMes})(\text{cod})_2]$  (4)

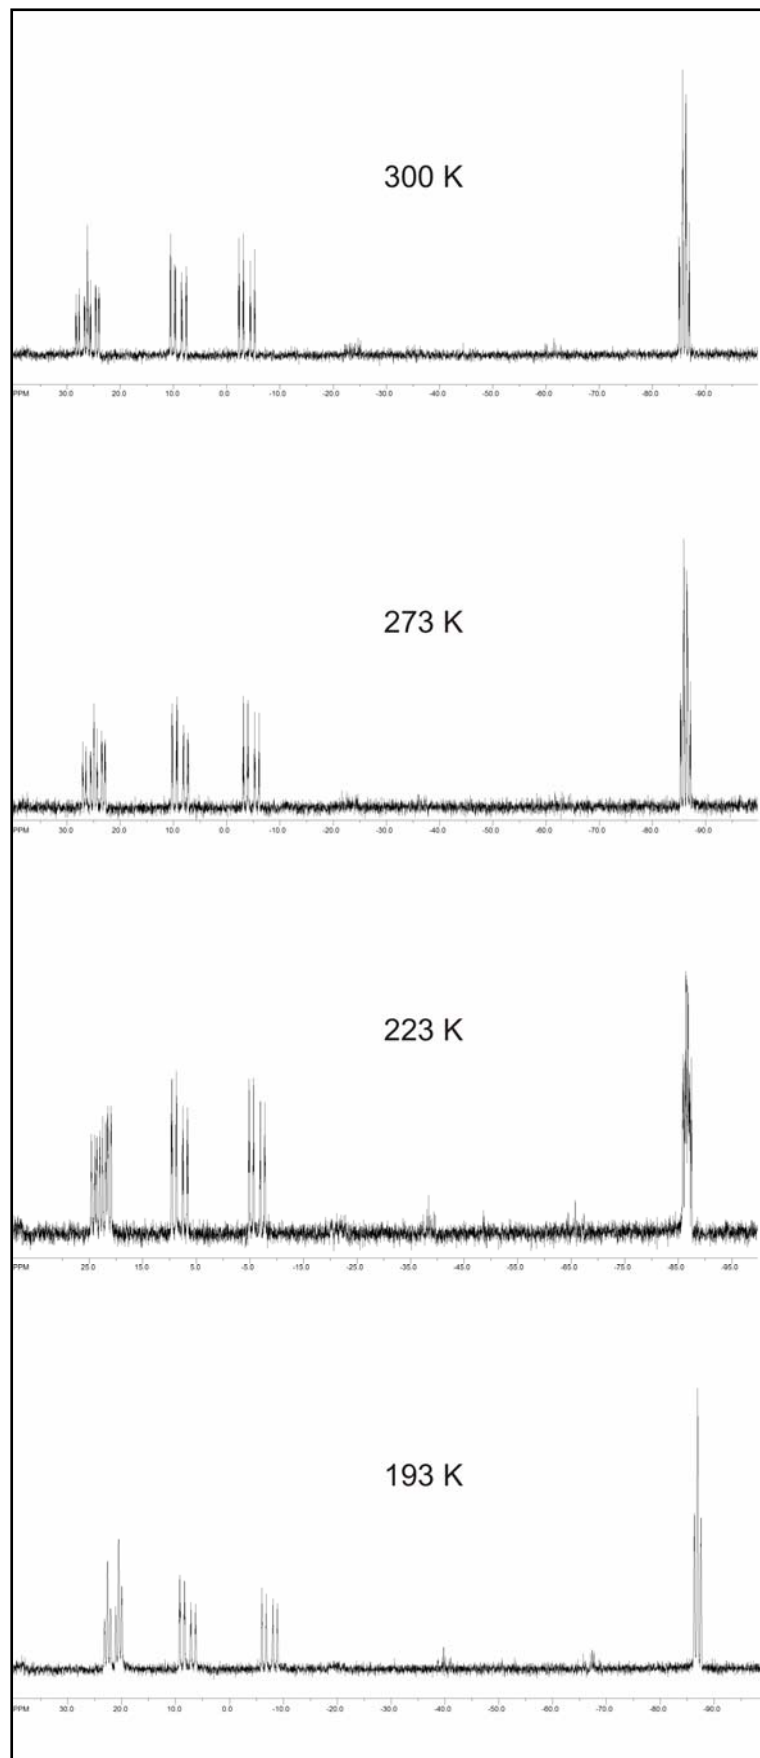

Supplement: b718727k.pdf [file b718727k.pdf]
